# Supplementary material for: From Supply Chain Networks to Diplomatic Alignment: A Dynamic Network Analysis Using Temporal ERGMs
Source: Research Square preprint supplement (doi:10.21203/rs.3.rs-8525858/v1), 2026-02-16
Supplement: Supplementary file 1 [file 1567f84b633e6f9d31f077b5.docx]

**Appendix**

The estimates reported in Table A1 serve as the empirical basis for the plot presented in Figure 2.

Table A1

|  | OLS | OLS |
| --- | --- | --- |
| Prob. of SP | -16.6235*** (4.8628) | -4.5053*** (1.6246) |
| VS out | 0.0266 (0.0383) | 0.0095 (0.0161) |
| Num. of CHN out-degree | -0.7824*** (0.2958) | -3.4013*** (1.1211) |
| Prob. of SP×VS out×Num. of CHN out-degree | 2.4192** (1.1434) | 0.8135** (0.3731) |
| One-China Policy | -0.6182*** (0.0986) | -0.1637*** (0.0353) |
| Xinjiang | 0.6282*** (0.1434) | 0.1440*** (0.0475) |
| South China Sea | 0.3331*** (0.1262) | 0.1237*** (0.0423) |
| Hong Kong | -0.5258*** (0.1658) | -0.1498*** (0.0553) |
| SP’s Democracy Level | 0.2257*** (0.0614) | -0.0714 (0.0442) |
| GDPpc Ratio | 0.0135*** (0.0010) | -0.0005 (0.0013) |
| PopA_i | 0.0333*** (0.0047) | 0.0697* (0.0379) |
| PopB_CHN | 1.8007*** (0.3540) | 0.4630 (1.0750) |
| Dist. | -0.00002*** (0.000002) | -0.0063* (0.0035) |
| Constant | -22.3480*** (4.1294) | 77.8129** (38.4359) |
| Country FE | No | Yes |
| Year FE | No | Yes |
| Observations | 981 | 981 |
| R2 | 0.5335 | 0.9557 |
| Adjusted R2 | 0.5272 | 0.9521 |

*Note: * p<0.1; ** p<0.05; *** p<0.01*
